# Supplementary material for: Verwendung von forensischer Zahnmedizin zur Identitätsfeststellung. Eine Befragung auf Ebene der Länderpolizei
Source: Springer Nature journal article supplement (doi:10.1007/s00103-023-03769-2), 2023-09-27
Supplement: MOESM1 [file 26094876]

## Onlinematerial 1: Liste der im Onlinefragebogen enthaltenen Fragen

1. Wie alt sind Sie?

2. Bitte geben Sie ihr Geschlecht an:

- Weiblich  
 Männlich  
 Divers

3. In welchem Bundesland arbeiten Sie?

4. Über wie viele Berufsjahre in der Bearbeitung von Todesermittlungssachen, auch bei unbekanntem Toten, verfügen Sie?

5. Wie häufig kommt es zum Fund eines unbekanntem Leichnams pro Monat? (Durchschnitt in den letzten 10 Jahren)

- < 5 Funde pro Monat  
 > 5 Funde pro Monat  
 > 10 Funde pro Monat

Eigene Angabe:           Funde pro Monat

6. Gibt es in Ihrem Bundesland statistische Erhebungen hinsichtlich erfolgreicher Identifikation von unbekanntem Toten?

- Ja                   -> Bei Auswahl „Ja“ folgt Frage 7 für die Befragten, Frage 8 entfällt  
 Nein                   -> Bei Auswahl „Nein“ folgt direkt Frage 8 für die Befragten, Frage 7 entfällt

7. Wie viel Prozent der unbekanntem Toten werden primär mit Hilfe der zahnärztlichen Identifikation bestimmt?

*% werden mit Hilfe der dentalen Identifikation bestimmt.*

8. Wie schätzen Sie den prozentualen Anteil ein, der primär mit Hilfe der zahnärztlichen Identifikation bestimmt wird?

%

9. Bei der Auffindsituation eines unbekanntes Leichnams werden folgende Identifikationsmechanismen angewendet:

Mehrfachnennung möglich

- Fingerabdrücke/Daktyloskopie
- Zahnstatus/zahnärztliche Identifikation
- DNA
- Sekundäre Merkmale (Kleidung, Tätowierungen etc.)

Andere:

10. Nennen Sie den prozentualen Anteil der Methoden, die zur Identifizierung angewendet werden?

|                                                   | 0%                       | <25%                     | <50%                     | <75%                     | <=100%                   |
|---------------------------------------------------|--------------------------|--------------------------|--------------------------|--------------------------|--------------------------|
| Fingerabdrücke/Daktyloskopie                      | <input type="checkbox"/> | <input type="checkbox"/> | <input type="checkbox"/> | <input type="checkbox"/> | <input type="checkbox"/> |
| Zahnstatus/zahnärztliche Identifikation           | <input type="checkbox"/> | <input type="checkbox"/> | <input type="checkbox"/> | <input type="checkbox"/> | <input type="checkbox"/> |
| DNA                                               | <input type="checkbox"/> | <input type="checkbox"/> | <input type="checkbox"/> | <input type="checkbox"/> | <input type="checkbox"/> |
| Sekundäre Merkmale (Kleidung, Tätowierungen etc.) | <input type="checkbox"/> | <input type="checkbox"/> | <input type="checkbox"/> | <input type="checkbox"/> | <input type="checkbox"/> |

**11. Welche der Methoden eignen sich am besten zur Identifikation?**

1 = nicht ausreichend, 2 = ausreichend, 3 = befriedigend, 4 = gut, 5 = sehr gut

|                                                   | 1                        | 2                        | 3                        | 4                        | 5                        |
|---------------------------------------------------|--------------------------|--------------------------|--------------------------|--------------------------|--------------------------|
| Fingerabdrücke/Daktyloskopie                      | <input type="checkbox"/> | <input type="checkbox"/> | <input type="checkbox"/> | <input type="checkbox"/> | <input type="checkbox"/> |
| Zahnstatus/zahnärztliche Identifikation           | <input type="checkbox"/> | <input type="checkbox"/> | <input type="checkbox"/> | <input type="checkbox"/> | <input type="checkbox"/> |
| DNA                                               | <input type="checkbox"/> | <input type="checkbox"/> | <input type="checkbox"/> | <input type="checkbox"/> | <input type="checkbox"/> |
| Sekundäre Merkmale (Kleidung, Tätowierungen etc.) | <input type="checkbox"/> | <input type="checkbox"/> | <input type="checkbox"/> | <input type="checkbox"/> | <input type="checkbox"/> |

**12. Ist eine Kombination der primären Identifizierungsmethoden, um noch erfolgreicher zu sein, Standard?**

- Ja
- Nein

**13. Welche Methoden werden bevorzugt miteinander kombiniert?**

- Fingerabdrücke + Zahnstatus + DNA
- Fingerabdrücke + Zahnstatus
- Fingerabdrücke + DNA
- Zahnstatus + DNA
- Andere:

**14. Die zahnärztliche Identifikation ist eine gängige Methode zur Identifizierung von unbekanntem Toten. Wird sie oft angewandt?**

Ja oder Nein wählen + Begründung als Mehrfachnennung

**Ja, weil...**

- ... eine eindeutige Identifikation möglich ist (post-mortem Zahnstatus entspricht genau ante mortem Zahnstatus).
- ... sonstige Methoden wegfallen und Zähne beständig sind (siehe postmortem Zustand des Leichnams).
- ... es sich um eine günstige Methode handelt.
- ... Sonstiges:

**Nein, weil...**

- ... es sich um eine arbeitsaufwändige Methode handelt (Anfordern von antemortem Zahnstatus).
- ... die Mithilfe von externen Institutionen notwendig ist (Zahnärzte / -innen).
- ... Sonstiges:

**15. Zur eindeutigen Identifizierung eines unbekanntem Toten ist ein Vergleich post-mortem und ante-mortem Status erforderlich. Wie wird in Ihrer Organisationseinheit der post-mortem Zahnstatus bei einem unbekanntem Leichnam erhoben?**

Mehrfachnennungen möglich

- Eigene Polizeiinterne Kräfte
- Rechtsmedizin (Obduktion)
- Externe Spezialisten (z.B. spezialisierte Zahnärzte/-innen)
- Andere:

**16. Wie erfolgt die Kontaktaufnahme zu Zahnärzten/innen zwecks Abgleich post-mortem?**

Mehrfachnennungen möglich

- Printmedien (z.B. Zeitschriften wie die Zahnärztliche Mitteilungen)
- Digitale Medien
- Fachkreise (z.B. Arbeitskreis für forensische Odontostomatologie)
- Andere:

**17. Haben Sie einen festen Ansprechpartner für die zahnärztliche Identifikation?**

Zum Beispiel einen Zahnarzt/ eine Zahnärztin

- Ja -> Bei Auswahl „Ja“ folgt Frage 18 für die Befragten  
 Nein -> Bei Auswahl „Nein“ folgt direkt Frage 19 für die Befragten

**18. Welche Ausbildung hat diese/r Zahnarzt/-ärztin?**

- Forensische/r Odonto-Stomatologe/-in  
 Allgemeine/r Zahnarzt/-ärztin  
 Fachzahnarzt/-ärztin für Oralchirurgie  
 Fachzahnarzt/-ärztin für Kieferorthopädie  
 Mund-Kiefer-Gesichtschirurg/-in  
 Andere:

**19. Wie oft erhalten Sie eine Rückmeldung?**

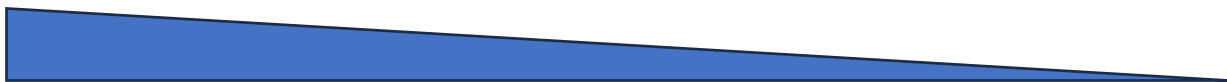

- Immer  
 Oft  
 Manchmal  
 Selten  
 Nie

**20. Von welchen Faktoren ist eine Rückmeldung Ihrer Meinung nach abhängig?**

Mehrfachnennungen möglich

- Eindeutiger Zahnstatus post-mortem  
 Gut geführte Patientenakten mit vollständigem Zahnstatus (ante-mortem)  
 Moderne Praxen (Digitalisierung)  
 Saisonabhängig (Sommer/Urlaubszeit)  
 Einzelbefund  
 Massenbefunde (siehe Katastrophen)  
 Bessere Mundgesundheit der Bevölkerung und somit weniger zahnärztliche Behandlungen (weniger Zahnersatz, weniger Röntgenbilder)  
 Andere:

**21. Welche Methode wird bei der zahnärztlichen Identifikation am häufigsten verwendet?**

Mehrfachnennung möglich

- Der Vergleich von postmortem – antemortem Zahnstatus m.H. des Dental Profiling (Untersuchungen der Zähne, Knochenstruktur, Mundhöhle, Weichteile, um ein Profil zu erstellen, Röntgenbilder, Zahnstatus)*
- DNA-Gewinnung aus einem Zahn mit nachfolgender DNA-Analyse*
- Altersdiagnostik*
- Odontometrische Geschlechtsbestimmung*
- Wissen über Medizinprodukte: z.B. Auslesen Chargennummer in Implantaten*
- Andere:*

**22. Wie hilfreich wäre eine digitale Plattform, um Zahnärzte/-innen zu erreichen?**

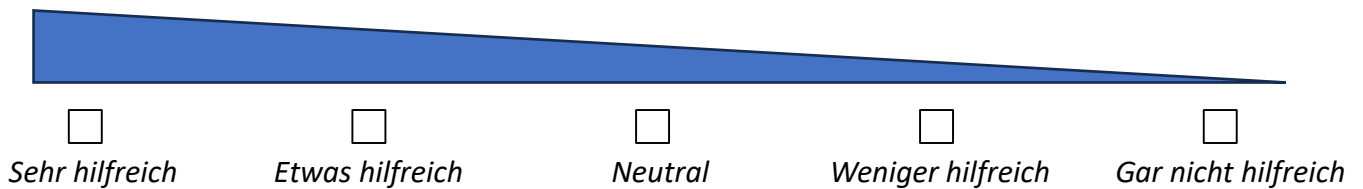

**23. Was würde die primäre Anwendung der zahnärztlichen Identifikation beim Fund eines unbekanntem Toten erleichtern?**

- Register*
- Datenblatt*
- Zentraler Ansprechpartner pro Bundesland (Forensische/r Odontostomato-  
loge/in)*
- Sonstige:*
