# Supplementary material for: Verwendung von forensischer Zahnmedizin zur Identitätsfeststellung. Eine Befragung auf Ebene der Länderpolizei
Source: Springer Nature journal article supplement (doi:10.1007/s00103-023-03769-2), 2023-09-27
Supplement: MOESM2 [file 26094876]

## Onlinematerial 2

Tab. Z1: Anzahl der aufgefunden unbekanntem Leichen im Zuständigkeitsbereich der Dienststelle

| Leichenfunde       | Anzahl der Angaben | Anteil (%) |
|--------------------|--------------------|------------|
| > 5 pro Monat      | 6                  | 9,7        |
| bis zu 5 pro Monat | 52                 | 83,9       |
| Keine Angabe       | 4                  | 6,5        |
| Gesamt             | 62                 | 100,0      |

Tab. Z2: Inanspruchnahme kombinierter Identifizierungsmethoden

| Kombination der Identifizierungsmethoden | Anzahl | Anteil (%) |
|------------------------------------------|--------|------------|
| Ja                                       | 45     | 72,6       |
| Nein                                     | 13     | 21,0       |
| Keine Angabe                             | 4      | 6,5        |
| Gesamt                                   | 62     | 100,0      |

Tab. Z3: Nützlichkeit einer digitalen Plattform um Zahnärzt\*innen zu erreichen

| Digitale Plattform  | Anzahl | Anteil (%) |
|---------------------|--------|------------|
| Gar nicht hilfreich | 1      | 1,6        |
| Weniger hilfreich   | 3      | 4,8        |
| Neutral             | 6      | 9,7        |
| Etwas Hilfreich     | 9      | 14,5       |
| Sehr Hilfreich      | 35     | 56,5       |
| Keine Angabe        | 8      | 12,9       |
| Gesamt              | 62     | 100,0      |

Tab. Z4: Optimierungsansätze zur Erleichterung der Anwendung der forensischen Zahnmedizin

| <b>Optimierungs-<br/>ansatz</b>                                                           | <b>Gewählt</b> | <b>Anteil<br/>(%)</b> | <b>Nicht<br/>gewählt</b> | <b>Anteil<br/>(%)</b> | <b>Gesamt</b> |
|-------------------------------------------------------------------------------------------|----------------|-----------------------|--------------------------|-----------------------|---------------|
| Register                                                                                  | 22             | 35,5                  | 40                       | 64,5                  | 100,0         |
| Datenblatt                                                                                | 8              | 12,9                  | 54                       | 87,1                  | 100,0         |
| Zentraler<br>Ansprechpartner pro<br>Bundesland<br>(Forensische/r<br>Odontostomatologe/in) | 39             | 62,9                  | 23                       | 37,1                  | 100,0         |
